# Supplementary material
Source: Springer Nature journal article supplement (https://www.springermedizin.de/resource/supplementary/13012_2010_276_MOESM3_ESM.pdf/9629614)
Supplement: MOESM3 [file 9629614]

Researcher Workshop to identify suitable theory using audit data, observational notes and a meeting transcript from one practice

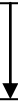

Development of four propositions of NPT for depression to test

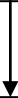

Use of online secure web software for testing of propositions – researchers blinded to propositions as NPT – presented as four statements

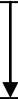

Researchers used pre-prepared template with the four propositions as statements and looked for confirming and disconfirming evidence from meeting transcripts

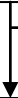

Meeting transcripts coded using interpretive framework of NPT. All data sets examined to check for evidence to illustrate propositions

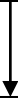

Workshop with study participants to introduce and test conceptual framework

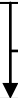

Conceptual framework for implementation of effective model and system of depression care developed

Group consensus on applicability of NPT

Study participants agreed on applicability of NPT conceptual framework
